# Supplementary material for: TBK1 Mutation Spectrum in an Extended European Patient Cohort with Frontotemporal Dementia and Amyotrophic Lateral Sclerosis
Source: PubMed Central journal article supplement — Hum Mutat. 2017 Jan 19;38(3):297–309. doi: 10.1002/humu.23161 (PMC5324646; doi:10.1002/humu.23161), 2017-01-19
Supplement: HUMU-38-297-s001.pdf [file HUMU-38-297-s001.pdf]

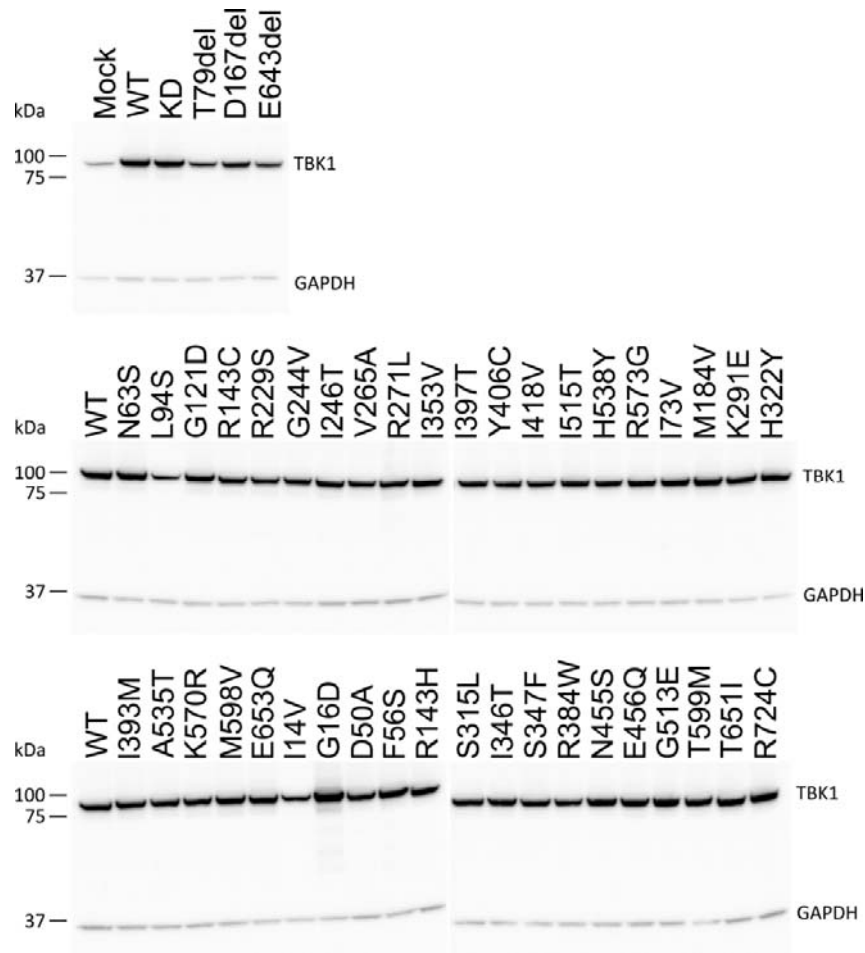

**Supp. Figure S1.** Western blot analysis of all identified single amino acid deletions and missense mutations overexpressed in HEK293T cells. *TBK1* plasmids containing a missense mutation or a single-amino acid deletion were transiently transfected in HEK293T cells. The p.Ser172Ala mutant (kinase dead, KD), generating a *TBK1* protein lacking kinase activity and the Mock plasmid containing no *TBK1*, were used as negative controls. Protein lysates of the *TBK1* overexpression cells were used for western blotting with an antibody against *TBK1* (Abcam, 1:1000, 84kDa) and GAPDH (Genetex, 1:10000, 37kDa) as a reference protein. *TBK1* signals of the mutant *TBK1* plasmids were compared to wild type *TBK1* (WT). p.Thr79del, p.Asp643del and p.Lys94Ser showed near 50% reduced protein expression, probably due to protein instability. All other *TBK1* mutations were equally expressed as the wild type *TBK1*.
